1     **AN ASSESSMENT OF THE VALUE OF DEEP NEURAL NETWORKS**  
2     **IN GENETIC RISK PREDICTION FOR SURGICALLY RELEVANT**  
3     **OUTCOMES**

4     Mathias A Christensen, MD<sup>1,2</sup>, Arnór Sigurdsson, MSc<sup>3,4</sup>, Alexander Bonde, MD<sup>1,2</sup>, Simon  
5     Rasmussen PhD<sup>3,4</sup>, Sisse R Ostrowski<sup>5,6</sup>, MD, PhD, DMSc, Mads Nielsen<sup>7</sup> PhD and Martin  
6     Sillesen\* MD, PhD<sup>1,2,5</sup>

7         1) Department of Organ Surgery and Transplantation.

8             Copenhagen University Hospital, Rigshospitalet, Denmark

9         2) Center for Surgical Translational and Artificial Intelligence Research (CSTAR)

10             Copenhagen University Hospital, Rigshospitalet, Denmark.

11         3) Novo Nordisk Foundation Center for Basic Metabolic Research, Faculty of Health  
12             and Medical Sciences, University of Copenhagen, Denmark

13  
14         4) The Novo Nordisk Foundation Center for Genomic Mechanisms of Disease, Broad  
15             Institute of MIT and Harvard, Cambridge, MA 02142, USA

16  
17         5) Department of Clinical Medicine, Faculty of Health and Medical Sciences, University  
18             of Copenhagen Medical School, Copenhagen, Denmark.

19         6) Department of Clinical Immunology, Rigshospitalet, Copenhagen University  
20             Hospital, Copenhagen, Denmark.

21         7) Department of Computer Science, University of Copenhagen, Copenhagen, Denmark.

22     Corresponding Author:

23     Martin Sillesen MD PhD  
24     Associate Professor of Surgery  
25     Copenhagen University Hospital, Rigshospitalet  
26     Department of Surgery and Transplantation  
27     Blegdamsvej 9  
28     2100 Copenhagen O  
29     Denmark  
30     Mail: [Martin.Sillesen@regionh.dk](mailto:Martin.Sillesen@regionh.dk)  
31     Phone: +45 3545 2122

NOTE: This preprint reports new research that has not been certified by peer review and should not be used to guide clinical practice.

## Abstract

### Introduction

Postoperative complications affect up to 15% of surgical patients constituting a major part of the overall disease burden in a modern healthcare system. While several surgical risk calculators have been developed, none have so far been shown to decrease the associated mortality and morbidity. Combining deep neural networks and genomics with the already established clinical predictors may hold promise for improvement.

### Methods

The UK Biobank was utilized to build linear and deep learning models for the prediction of surgery relevant outcomes. An initial GWAS for the relevant outcomes was initially conducted to select the Single Nucleotide Polymorphisms for inclusion in the models. Model performance was assessed with Receiver Operator Characteristics of the Area Under the Curve and optimum precision and recall. Feature importance was assessed with SHapley Additive exPlanations.

### Results

Models were generated for atrial fibrillation, venous thromboembolism and pneumonia as genetics only, clinical features only and a combined model. For venous thromboembolism, the ROC-AUCs were 59.6% [59.0%-59.7%], 63.4% [63.2%-63.4%] and 66.1% [65.7%-66.1%] for the linear models and 60.0% [57.8%-61.8%], 63.2% [61.2%-65.0%] and 65.4% [63.6%-67.2%] for the deep learning SNP, clinical and combined models, respectively. For atrial fibrillation, the ROC-AUCs were 60.9% [60.6%-61.0%], 78.7% [78.7%-78.7%] and 80.1% [80.0%-80.1%] for the linear models and 59.9% [60.6%-61.3%], 78.8% [77.8%-79.8%] and 79.4% [78.8%-80.5%] for the deep learning SNP, clinical and combined models, respectively. For pneumonia, the ROC-AUCs were 57.3% [56.5%-57.4%], 69.2% [69.1%-69.2%] and 70.5% [70.2%-70.6%] for the linear models and 55.5% [54.1%-56.9%], 69.7% [68.5%-70.8%] and 69.9% [68.7%-71.0%] for the deep learning SNP, clinical and combined models, respectively.

### Conclusion

In this report we presented linear and deep learning predictive models for surgery relevant outcomes. Overall, predictability was similar between linear and deep learning models and inclusion of genetics seemed to improve accuracy.

77

## INTRODUCTION

78

Worldwide, more than 310 million surgeries are performed each year, addressing an estimated 11% of the global burden of disease.(1, 2) While most surgical patients proceed to an uneventful recovery, current estimates indicate that roughly 4% die as a direct or indirect result of surgery, while up to 15% experience a postoperative complication (PC), prolonging hospital length-of-stay with consequential morbidity.(2)

83

While treatment advances following the implementation of approaches such as Enhanced Recovery after Surgery (ERAS) protocols have been well documented, the incidences of PCs have remained remarkably stable over the last decade.(3) As such, a stable subset of patients still experiences PCs, suggesting that this patient group could potentially benefit from a deviation from the current one-size-fits all approach deployed by most ERAS protocols and a move towards a precision medicine approach in the surgical setting.

89

To achieve this goal, risk predictions models are, however, needed for the identification of patients who will fail standard ERAS protocols.

91

To this end, many risk assessment tools have been fielded to identify at-risk patients including the regression-based American College of Surgeons National Surgical Quality Improvement Program (ACS-NSQIP) risk calculator as well as newer machine learning approaches investigating the value of random forests or deep neural networks (DNNs).(4, 5)

95

These models are, however, limited by the fact that they only perform predictions on available clinical data, which may provide insights into parts of the driving factors of the patients risks only.

98

As such, recent data has suggested that genetic susceptibility could, in part, be a modifier of individual PCs risk, thus opening the potential for adding genetic data points to risk

100

prediction models in order to improve model performance.(6, 7)

101 Genetic variations are increasingly being recognized as an important modality for various  
102 surgical adverse events including venous thromboembolisms, renal complications and cardiac  
103 arrhythmias.(6, 8, 9) However, it is currently not clear to what degree genetic susceptibility  
104 contribute to the overall risk compared with other well-known clinical risk factors.  
105 Furthermore, as genetic susceptibility may include complex non-linear effects such as  
106 previously non-identified complex interactions between genes that possibly lie far from each  
107 other in the human genome, optimal modelling strategies remain unknown. As such, whether  
108 legacy risk prediction approaches such as the linear Polygenic Risk Scores (PGS),  
109 traditionally utilized to assess an overall genetic risk composition and weighted sum for the  
110 phenotype in question, could be inferior to a DNN approach, is currently unknown.(10)  
111 Using the clinical question of assessing whether DNNs can outperform a classic PGS  
112 approach for assessing genotype-associated risk of PCs, we target three high impact PCs with  
113 proven genetic susceptibility.(11) These include postoperative pneumonias, postoperative  
114 venous thromboembolisms (pVTEs) and postoperative atrial fibrillation (pAFLI).  
115 Furthermore, we investigate whether single nucleotide polymorphisms (SNPs) highlighted as  
116 driving the phenotype, differ between DNN and PGS approaches, thus potentially indicating  
117 that non-linear genotype-phenotype associations can be identified by the DNN approach.  
118 We hypothesize that DNNs will achieve superior predictive performance in predicting the  
119 genotype-associated risk of these PCs compared with a linear PGS, and that the DNN models  
120 will highlight a different subset of important SNPs compared with a linear PGS.

121 **METHODS**

122 This study utilized genotype data from the United Kingdom biobank (UKB) consortium.(12)  
123 Access to the UKB data was approved by the consortium (Study ID #60861). Under Danish  
124 law, the study was exempt from ethical board approval due to the anonymized nature of the  
125 dataset.

126 We conducted a comparative study of different methodologies for genotyping risk prediction  
127 and Single Nucleotide Polymorphism (SNP)-identification in a general as well as a surgical,  
128 national cohort.

129 For the initial approach, we conducted standard GWAS-analyses without covariates on the  
130 chosen phenotypes with a high prevalence following surgery. Details for the GWAS are  
131 described below. These phenotypes included venous thromboembolisms (VTE), atrial  
132 fibrillation (AF) and bacterial pneumonia.

133 UKB has more than 500,000 individuals enrolled and consented across the United Kingdom  
134 of the age from 40 to 69. Patients were invited for participation through National Health  
135 service (NHS) registries and asked to fill surveys on basic demographic data, general lifestyle  
136 measures as well as medical history. Inclusion of all participants took place from 2006 to  
137 2010.

138  
139 *Identification of cohort*

140 All patients with available genomic data in the UKB were initially included for  
141 analysis. Cases were identified depending on the phenotype in question. For AF, VTE and  
142 pneumonia, cases were defined using relevant *International Statistical Classification of*  
143 *Disease, 9<sup>th</sup> revision* (ICD-9) and ICD-10 codes.

144 The phenotypes in question were identified with the ICD-9 and ICD-10 codes listed in  
145 supplementary table 1. The cohorts were split into training/validation and test sets. The

146 training/validation set consisted of all non-surgical patients and a random sample of 80% of  
147 the surgical cohort. The test set consisted of the remaining 20% of the surgical cohort.  
148 Surgery was defined with the OPCS-4 codes listed in supplementary table 2. The post-  
149 surgical phenotypes were defined with the same ICD-codes as above registered up to 30 days  
150 after the given procedure. For AF, only first-time diagnoses were counted as post-surgery  
151 cases. For VTE and pneumonia, any diagnoses within 30 days were counted as cases,  
152 regardless of previous history.

153 For each outcome of interest (pAF, pVTE and pneumonia, both deep learning and linear  
154 models were created using three distinct input strategies (see below for model descriptions):

- 155 1. A genotype only model: using only the identified SNPs (see below) as input (SNP  
156 model)
- 157 2. A clinical data only model: using only clinical data as input (Clinical model)
- 158 3. A combined model: using both SNPs and clinical data as input (Combined model)

159 Input SNPs were the top 100 SNPs from the discovery GWAS for each phenotype of interest,  
160 with clinical data including demographics and comorbidities (supplementary table 3) and  
161 combined models including both genetic and clinical data.

### 162 *Quality control*

163 The first 50,000 individuals included in UKB were genotyped using the Applied  
164 Biosystems UK BiLEVE Axiom Array. The remaining were genotyped using the Applied  
165 Biosystems UK Biobank Axiom Array. The two array types are equal, and the differences are  
166 not of significance. The arrays interrogated 850,000 SNPs in total. To account for potential  
167 biases, patients with outlying heterozygosity rates, cryptic relatedness (PIHAT cut-off 0.2)  
168 and sex discrepancies in data were excluded. To ensure that only participants with high-  
169 quality genomic information were included for analysis, everyone with a genotyping rate of  
170 98% or less were excluded. To ensure that only high-quality genetic variants were left for

171 analyses, a missingness rate of 2% were used as a cut-off point. Lastly, a Minor Allele  
172 Frequency (MAF) of > 5% was used, and variants found not to be in Hardy-Weinberg  
173 equilibrium were excluded (threshold:  $1 \times 10^{-6}$  for both cases and controls).

174

#### 175 *Linear Polygenic risk score (PGS) modelling approach*

176 The initial GWAS-analyses were analyzed using a mixed linear model (MLM)  
177 approach. GCTA version 1.93 beta for Windows was used to conduct the analyses. The  
178 MLM-model was created using fastGWA with a sparse genetic relationship matrix (GRM)  
179 with non-imputed data from the UKB. For all the phenotypes analyzed in the respective  
180 GWAS, the 100 most significant SNPs were included in the genetic and mixed models. The  
181 choice to utilize only the top 100 SNPs was made to optimize the balance between predictive  
182 power and keeping the model computational pragmatic. SNPs are referenced using the  
183 dbSNP (rs) reference number. The cohorts were split into training/validation and test sets.  
184 Relevant GWAS plots, including Manhattan and Quantile-Quantile (QQ) plots were  
185 generated using qqman (R version 4.0.2).(13) Performance plots including ROC-AUCs and  
186 heatmaps were created using Scikit-learn 1.2.1 (Python 3).(14)  
187 A linear PGS was generated using the logistic regression module as implemented in scikit-  
188 learn 1.2.1 for Python 3. Models were created with both L1 (lasso) and L2 (ridge)  
189 regularization. Feature importance was determined by coefficients of the SNPs.

190

#### 191 *Deep neural network (DNN) modelling approach*

192 All DNN models were implemented using EIR (version 0.1.25-alpha).(15) EIR is a  
193 framework that incorporates genetic, clinical, image, sequencing, and binary data for  
194 supervised training of deep learning models. A held-out test set was used for all models to  
195 obtain a final performance after training and validation. The Cross Entropy loss was

196 employed during training for the classification tasks. All models were trained with a batch  
197 size of 64. During training, plateau learning rate scheduling was used to reduce the learning  
198 rate by a factor of 0.2 if the validation performance had not improved for 10 steps, with a  
199 validation interval of 500 steps. Early stopping was used to terminate training when  
200 performance had not improved with a patience of 16 steps. The early stopping criterion was  
201 activated after a buffer of 2,000 iterations. All models were trained with the Adam optimizer  
202 with a weight decay of  $1 \times 10^{-4}$  and a base learning rate of  $1 \times 10^{-3}$ .(16) For the neural network  
203 models, we augmented the genotype input by randomly setting 40% of the SNPs as missing  
204 in the one-hot encoded array. All DNN models utilize the genome-localnet (GLN)  
205 architecture for the genotype feature extraction.(15) The same cohort splits were used as in  
206 the linear PGS-approach. Importance of features were determined using SHapley Additive  
207 exPlanations (SHAP) values.(17)  
208



## 209 RESULTS

### 210 *Cohort*

211 We identified 488,377 patients in the UKB with available genetic and relevant phenotypic  
212 data, with 446,180 patients available for analyses after genetic quality measures were applied  
213 and were used for both the linear and deep learning modelling approaches.

214 For the outcomes of interest, 19,704 had a diagnosis of AF, 9,101 had a diagnosis of VTE  
215 and 13,757 had a diagnosis of pneumonia overall in the UKB.

216

### 217 *Linear models*

#### 218 *Atrial fibrillation*

219 Baseline characteristics are listed in table 1. The SNP model reached a ROC-AUC of 60.9%  
220 [95% CI, 60.6%-61.0%]. All individuals were classified as not having AF. The clinical model  
221 reached a ROC-AUC of 78.7% [95% CI, 78.7%-78.7%] with a recall of 9% and a precision  
222 of 53%. The combined model reached a ROC-AUC of 80.1% [95% CI, 80.0%-80.1%] with a  
223 recall of 9% and a precision of 57%. All performances are depicted in figure 3A. The SNPs  
224 and the associated genes with the highest feature importance are listed in table 4B.

225

#### 226 *Venous thromboembolism*

227 Baseline characteristics for VTE are listed in table 2. The SNP model reached a ROC-AUC  
228 of 59.6% [95% CI, 59.0%-59.7%]. All individuals were classified as not having VTE. The  
229 clinical model reached a ROC-AUC of 63.4% [95% CI, 63.2%-63.4%]. All individuals were  
230 classified as not having VTE. The combined model reached a ROC-AUC of 66.1% [95% CI,  
231 65.7%-66.1%]. All individuals were classified as not having VTE. All performances are  
232 depicted in figure 3B. The SNPs and the associated genes with the highest feature importance  
233 are listed in table 4D.

234

235 *Pneumonia*

236 Baseline characteristics are listed in table 3. The SNP model reached a ROC-AUC of 57.3%  
237 [95% CI, 56.5%-57.4%]. All individuals were classified as not having pneumonia. The  
238 clinical model reached a ROC-AUC of 69.2% [95% CI, 69.1%-69.2%]. All individuals were  
239 classified as not having pneumonia. The combined model reached a ROC-AUC of 70.5%  
240 [95% CI, 70.2%-70.6%] with a recall of 0.01% and a precision of 0.4%. The SNPs and the  
241 associated genes with the highest feature importance are listed in table 4F. All performances  
242 are depicted in figure 3C.

243

244 ***Deep learning models***

245 *Atrial fibrillation*

246 The SNP model reached a ROC-AUC of 59.9% [95% CI, 58.6%-61.3%] in the test set.  
247 Recall was 36.9% and precision was 9.3%. The clinical model reached a ROC-AUC of  
248 78.8% [95% CI, 77.8%-79.8%] with recall and precision of 72.0% and 13.5%, respectively.  
249 The combined model reached a ROC-AUC of 79.4% [95% CI, 78.8%-80.5%] with a recall  
250 and precision of 74.8% and 13.5%, respectively. The SNPs and the associated genes with the  
251 highest feature importance are listed in table 4A. All performances are depicted in figure 3A.  
252 Hard predictions are depicted in figure 1A. ROC-AUC development is depicted in figure 2A.

253

254 *VTE*

255 The SNP model reached a ROC-AUC of 60.0% [95% CI, 57.8%-61.8%] with a recall of  
256 50.8% and precision of 4%. The clinical model reached a ROC-AUC of 63.2% [95% CI,  
257 61.2%-65.0%] with a recall and precision of 67.5% and 4.0%, respectively. The combined  
258 model reached a ROC-AUC of 65.4% [95% CI, 63.6%-67.2%] with a recall and precision

259 68.8% and 4.0%, respectively. The SNPs and the associated genes with the highest feature  
260 importance are listed in table 4C. All performances are depicted in figure 3B. Hard  
261 predictions are depicted in figure 1B. ROC-AUC development is depicted in figure 2B.

262

### 263 *Pneumonia*

264 The SNP model reached a ROC-AUC of 55.5% [95% CI, 54.1%-56.9%] with a recall of  
265 55.0% and precision of 5%. The clinical model reached a ROC-AUC of 69.7% [95% CI,  
266 68.5%-70.8%] with a recall and precision of 67.7% and 7.4%, respectively. The combined  
267 model reached a ROC-AUC of 69.9% [95% CI, 68.7%-71.0%] with a recall and precision of  
268 70.1% and 7.3%, respectively. The SNPs and the associated genes with the highest feature  
269 importance are listed in table 4E. All performances are depicted in figure 3C. Hard  
270 predictions are depicted in figure 1C. ROC-AUC development is depicted in figure 2C.

271

272  
273  
274  
275  
276  
277  
278  
279  
280  
281  
282  
283  
284  
285  
286  
287  
288  
289  
290  
291  
292  
293  
294  
295  
296

## DISCUSSION

In this study, we assessed the performance of linear and deep learning models including genotypic information on specific phenotypes relevant for pAFLI, pVTE and postoperative pneumonia. Overall, we found that adding SNP data to clinical risk prediction models enhanced the predictive power, and that the GLN approach seemed superior to a legacy linear risk prediction approach.

### *Modelling approaches*

All three SNP linear models failed to make any meaningful hard predictions, as they classified all individuals in the cohorts as not having the disease in question. However, the separations were roughly similar to the GLN-models, as demonstrated by similarity in ROC-AUC performance, and the lack of positive predictions may be due to imbalanced data and skewed threshold for hard predictions. The GLN-models performed better on recall and precision, and it was able to classify positives correctly with just genomic information. Given that the linear and GLN models utilize distinct tuning parameters for hard predictions, a direct comparison of recall and precision may not be critically significant. However, as hard predictions are necessary in a clinical setting, a discussion is still warranted. Precision-recall curves are depicted in supplementary materials.

It is exemplified for AF, where the genetic linear model had a ROC-AUC of 60.9% [95% CI 69.6%-61.0%] while the GLN had a ROC-AUC of 59.9% [95% CI 5.8.6%-61.3%]. The recall, however, was 0% and 36.9%, respectively. As the linear model performed very poorly in terms of recall, the result is likely to be the result of the imbalanced data and failure to capture feature relevance and possibly non-linearity and would need optimization before any form of utilization for positive prediction in a clinical setting. On the contrary, the GLN-model had a recall of 36.9% and therefore identifies around one third of cases correctly,

297 which heightens the likelihood of clinical meaningful utilization considering only SNPs were  
298 included in the model. However, the precision was calculated low at 4%, which would lead to  
299 overdiagnosis and possibly overtreatment. If used in clinical practice, it is therefore of  
300 paramount importance that any possible intervention would carry little to no risk of harm. It,  
301 however, cannot be ruled out that the differences between the models are not due to an  
302 inherent predictive advantage in the GLN-model, but simply due to different hyperparameter  
303 tuning.

304 When combining SNP and clinical data for all phenotypes in question, we observed a trend  
305 towards better performance compared with SNP or clinical data only models, although most  
306 confidence intervals were overlapping with clinical model performances. This thus indicates  
307 that limited performance gains could be obtained by combining genetic and clinical data and  
308 may suggest that genotype effects may already in part be captured by diagnoses codes.  
309 Alternatively, the lack of performance improvement could be affected by limited study power  
310 due to factors such as lack of correct PC diagnoses codes, a problem often encountered when  
311 administrative codes are used for PC curation.(18)

312 GLN based models did, however, outperform linear approaches in terms of recall  
313 performance, might indicate that the ability to capture the effects of non-linear genetic traits  
314 on the overall phenotype, may be possible through this modelling approach.

315

### 316 *Identified Single Nucleotide Polymorphisms*

317 In the GLN-model, rs3807989 was the most activated SNP in regards of classifying  
318 individuals with AF. It is an intron variant in *CAVI* which codes for a main component in  
319 caveolae plasma membrane and further acts as a tumor suppressor.(19, 20) It has been  
320 associated with a large variety of diseases including AF in numerous populations.(21, 22)  
321 Interestingly, the prevalence of the reference and risk allele is roughly equal which suggests

322 the possibility of a relatively new mutation or that the risk variant has a different functional  
323 advantage which balances the selection. The most highly activated SNP in the GLN-model  
324 with importance for classifying patients for not having AF was rs17042081, a variant near  
325 4q25, which has been extensively associated with AF in a variety of populations and in close  
326 proximity to *PITX2*.(23, 24), The variants most highly associated with AF in the linear model  
327 was rs17042171, also a variant near 4q25. The alternative allele has worldwide prevalence of  
328 up to 16% and 13% in the European population, which makes the risk variant very common,  
329 although not equal to the reference allele suggesting a negative selection pressure of the risk  
330 allele.(25) As the testing set consists of purely surgical patients, it is not unexpected that  
331 variants near 4q25 are important for the models, as the same region was the only one  
332 associated with postoperative AF in a recent GWAS-analysis from our group.(7)  
333 The difference in which variants show importance for the GLN and linear model,  
334 respectively, and that the GLN-models in general performed significantly better in recall  
335 compared with the matching linear, shows that non-linear interactions between genes which  
336 are potentially of great importance in the risk of a particular trait. Other explanations include  
337 non-linear effects in non-genetic features, such as age and sex, or dominant/recessive effects  
338 of the SNPs in question.

339 When exploring pathways and interactions for the most highly activated genes in online  
340 repositories such as the Reactome Pathway Database and BioGRID, it appears that none of  
341 the genes have previously been described to be in a direct pathway or in any kind of  
342 interaction. Interestingly, Gao et al. showed that the level of caveolin-1 determines the level  
343 of product of *KCNN1* which previously has been highly associated with AF in several  
344 GWAS-studies.(21, 26-28)

345 The SNPs with highest importance for classifying VTE in the GLN-model was rs505922, an  
346 intron variant in *ABO*.(29) The variant has previously been associated with VTE.(6) The

347 ABO blood group antigen genes are amongst the most heavily associated with VTE, and it  
348 has a biological plausible explanation, thus it is expected that specific variants within these  
349 genes would play a significant role in predictive models for VTE risk.

350 The SNP that had the highest feature importance in the GLN-model for classifying bacterial  
351 pneumonia was rs11080143. However, as the model performed poorly in terms of the overall  
352 accuracy, there is a high likelihood that the highest activated variants are not due to genuine,  
353 biological phenomena and interactions, but rather due to chance alone. This sentiment is  
354 further supported by the fact that rs11080143 has no reported clinical significance in the  
355 literature and does not lie close to any biological meaningful genes. One downstream gene,  
356 *KSR1*, has been associated with different malignancies including breast adenocarcinoma and  
357 thyroid cancer.(30, 31) To our knowledge, *KSR1* has not been associated directly with lung  
358 cancer, but considering the protein product has a positive downstream signaling function of  
359 the RAS/MAPK pathway, and the association with other cancers, a connection seems likely.

360 Although a history of cancer was included as a covariate in the initial GWAS and in both  
361 models, it cannot be ruled out that the phenotype and models are confounded by occult lung  
362 malignancy.

363 In the linear model, rs10519203 was the most associated with classifying pneumonia. It is an  
364 intron variant in *HYKK* and has previously been associated with lung cancer and smoking  
365 behavior, which may indicate the basis for its ability to classify pneumonia, and not an  
366 inherent increased risk to infection.(32, 33)

367 We again observed a discrepancy between the variants with highest feature importance  
368 between the models, which suggests that complex non-linear effects may exist between the  
369 genes in question activated by the GLN-model. It should be noted that while all the  
370 phenotypes of interest in this study are complex diseases, we find it likely that the  
371 susceptibility to bacterial pneumonia is less driven by genetics compared with AF and VTE.

372 Although certain genetic variants have been associated pneumonia susceptibility, the genetic  
373 landscape has not been explored to the same extent as with AF and especially VTE.  
374 Consequently, the ratio of importance of the input variants compared with the clinical factors  
375 included is likely lower compared with AF and VTE, and we anticipate that future research  
376 will highlight the importance of genetics compared with clinical factors in predictive  
377 modelling.

378

### 379 *Potentials for clinical use*

380 As these analyses were specifically made on phenotypes relevant for the postoperative course  
381 of surgical patients, it is of utmost importance that the models in question can be validated  
382 and potentially optimized in a specific surgical cohort. Above all, this will ascertain the  
383 utilization on this specific population, and it will further establish a foundation for the  
384 investigation into if the models are able to improve the outcomes for the phenotypes in  
385 question or be of prophylactic benefit. Further, as multiple surgical risk predictors built on  
386 clinical data already exist, investigate whether the addition of genetic data will enhance the  
387 predictability of such models could offer a promising pathway for increasing the model  
388 performances further. It is key to establish methods to improve prediction, as the current  
389 standard of models fail to demonstrate any clear clinical benefit compared with standard  
390 practice.(34) Although multiple factors account for the current limited applicability, including  
391 lacking external validity and variance in the retro- and prospective data, a lack of important  
392 factors such as genetics may also be of significance. Further, as we present a model where a  
393 deep learning framework specifically made to incorporate genetics with clinical variables that  
394 performs better compared with a linear PGS in terms of recall and precision, it is important to  
395 consider the quality of the used software as well as the pragmatic applicability of the models



396 in question in a real-life scenario. At this time, neither model have applicability if  
397 incorporating only the top 100 SNPs, as determined by the poor accuracy performance.

398

399

#### 400 *Limitations*

401 This study has limitations. First, all phenotypes were established using only ICD-codes which  
402 may have a low accuracy for the phenotypes in question. We suspect especially bacterial  
403 pneumonia to have an overall low accuracy due to the high hospital incidence and difference  
404 in presentation as well differences in the microbiological organism and treatments. This  
405 generates a heterogenous group which lowers the predictability and clinical utility.

406 Further, we assumed that the one hundred most significant SNPs from an initial GWAS for  
407 the phenotype in question would be of interest, although this was an arbitrary choosing due to  
408 the need to find an optimum between predictive power and computational efficacy. Other  
409 SNPs may also be of importance, and using a different set or potentially the entire genome  
410 has the potential to achieve similar or even better genetic predictability, although the latter  
411 would be too computational costly and of less clinical utility. A significant challenge in our  
412 study is the imbalanced data, which especially proved problematic in the linear models which  
413 all had a recall of 0. Larger cohorts, or a more balanced dataset may improve this.

414

#### 415 *Conclusion*

416 In conclusion, we present predictive models on surgery relevant phenotypes  
417 incorporating a small sample of genetic variants. Overall, GLN-based models performed  
418 equally when compared with linear models based on the AUC metric. However, recall and  
419 precision were better in the GLN-based model, making them more useful in a potential  
420 clinical setting. Further, different SNPs were important for the same phenotypes between

421 models suggesting importance off non-linear interactions. Lastly, in a comparison between  
422 clinical models with and without inclusion of SNPs, the inclusion of genetic data seemed to  
423 increase the accuracy, albeit with overlapping confidence intervals. This is a preliminary  
424 report assessing the utility of using a small sample of SNPs for clinical risk prediction. Future  
425 research needs to validate models in surgical cohorts and assess the utility of incorporating  
426 genetics and clinical variables in predictive models to improve surgical outcomes.

427

428

429

430

431

432

433

434

435

436

437

438

439

440

441

442

443

444

445

446

## FIGURES

447 **Figure 1A:** Heatmap of the genetic deep learning-model of atrial fibrillation. 1 = controls, 2

448 = cases

449

450

451

452

453

454

455

456

457

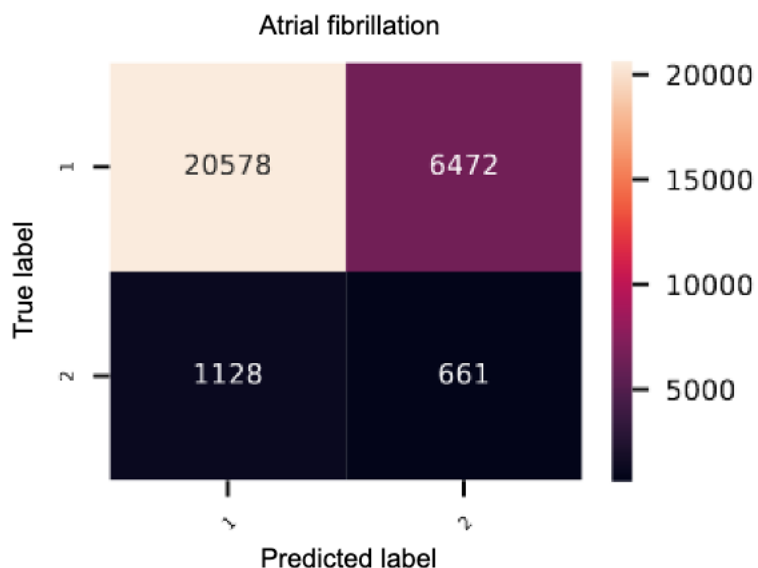

458

459 **Figure 1B:** Heatmap of the genetic deep learning-model of venous thromboembolism. 1 =

460 control, 2 = cases. VTE: venous thromboembolism

461

462

463

464

465

466

467

468

469

470

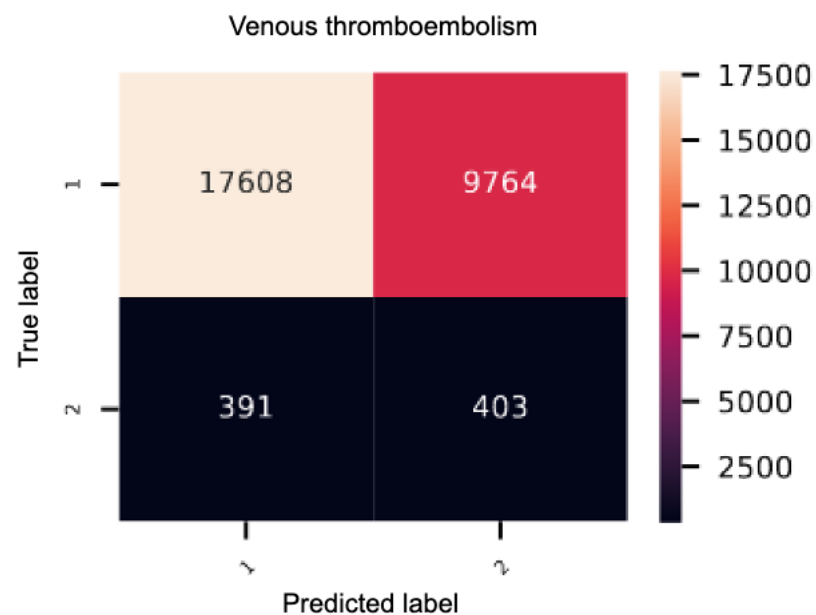

471 **Figure 1C:** Heatmap of the genetic deep learning model of bacterial pneumonia. 1 = control,  
472 2 = cases.

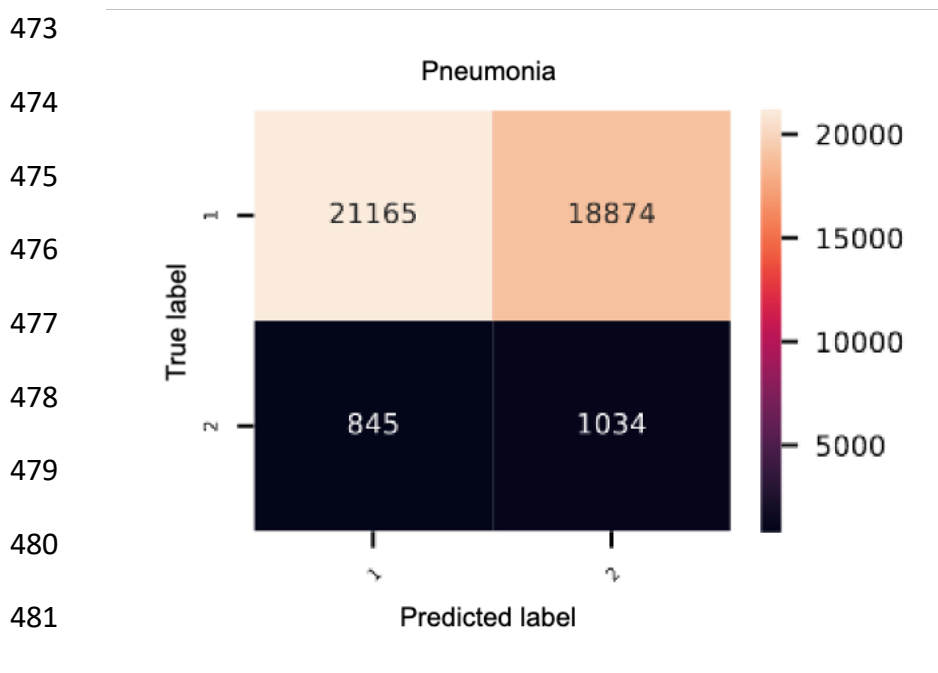

483

484 **Figure 2A:** ROC-AUC development of the genetic GLN-model of atrial fibrillation

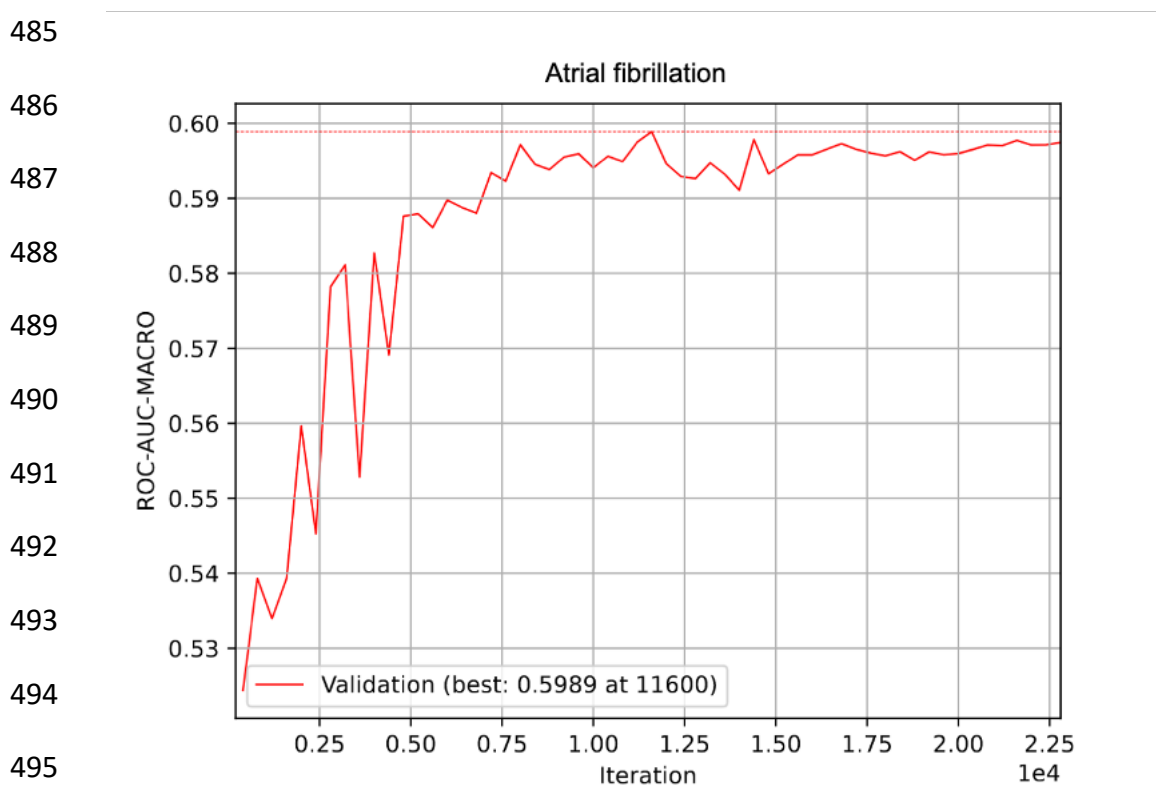

496 **Figure 2B:** ROC-AUC development of the genetic GLN-model of venous thromboembolism

497

498

499

500

501

502

503

504

505

506

507

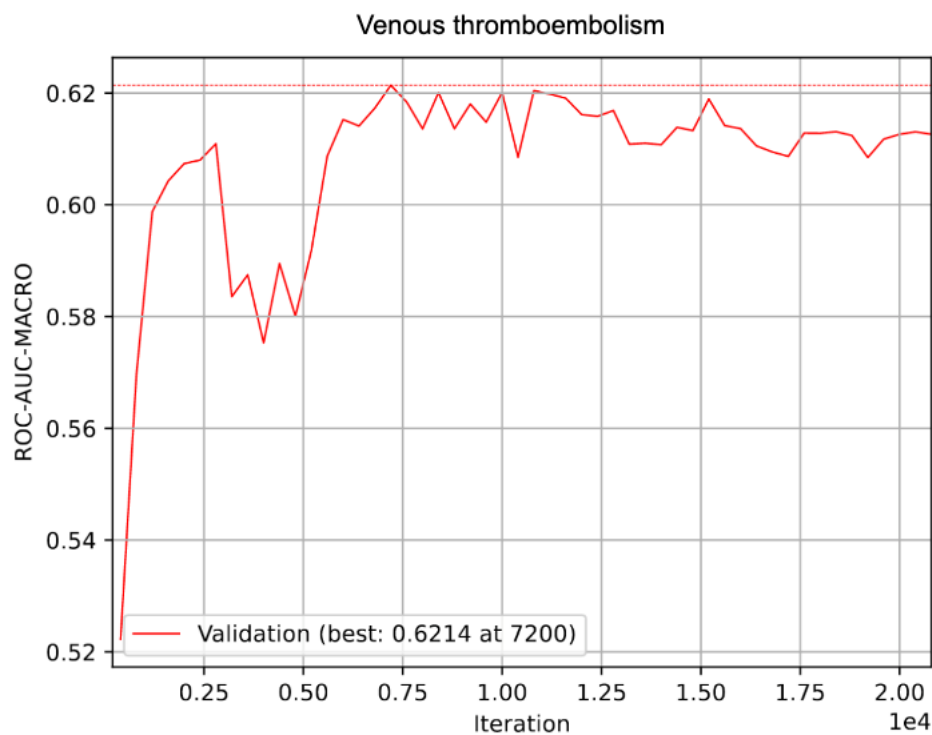

510 **Figure 2C:** ROC-AUC development of the genetic GLN-model of bacterial pneumonia

511

512

513

514

515

516

517

518

519

520

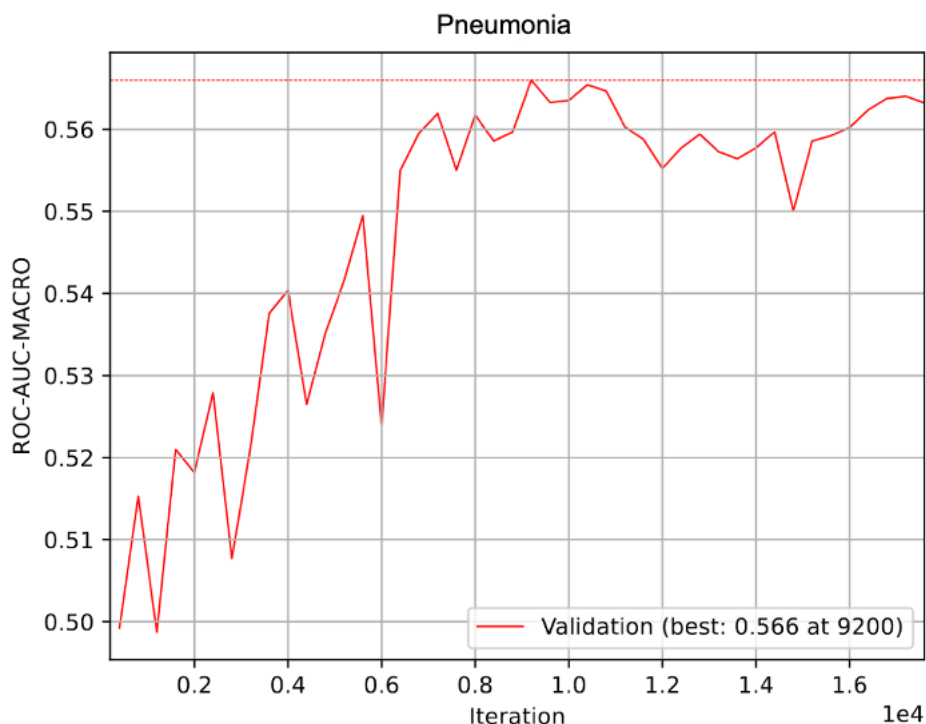

521 **Figure 3A:** Bar plot of ROC-AUCs of all atrial fibrillation models

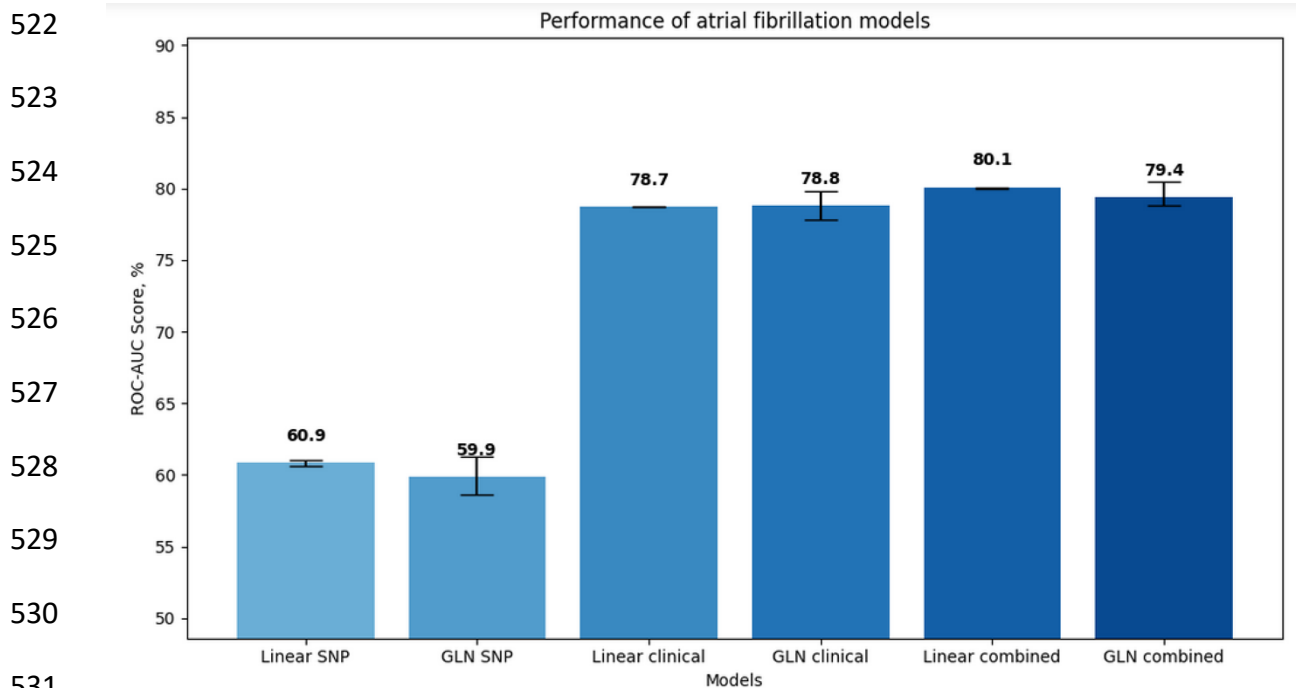

532

533 **Figure 3B:** Bar plot of ROC-AUCs of all venous thromboembolism models

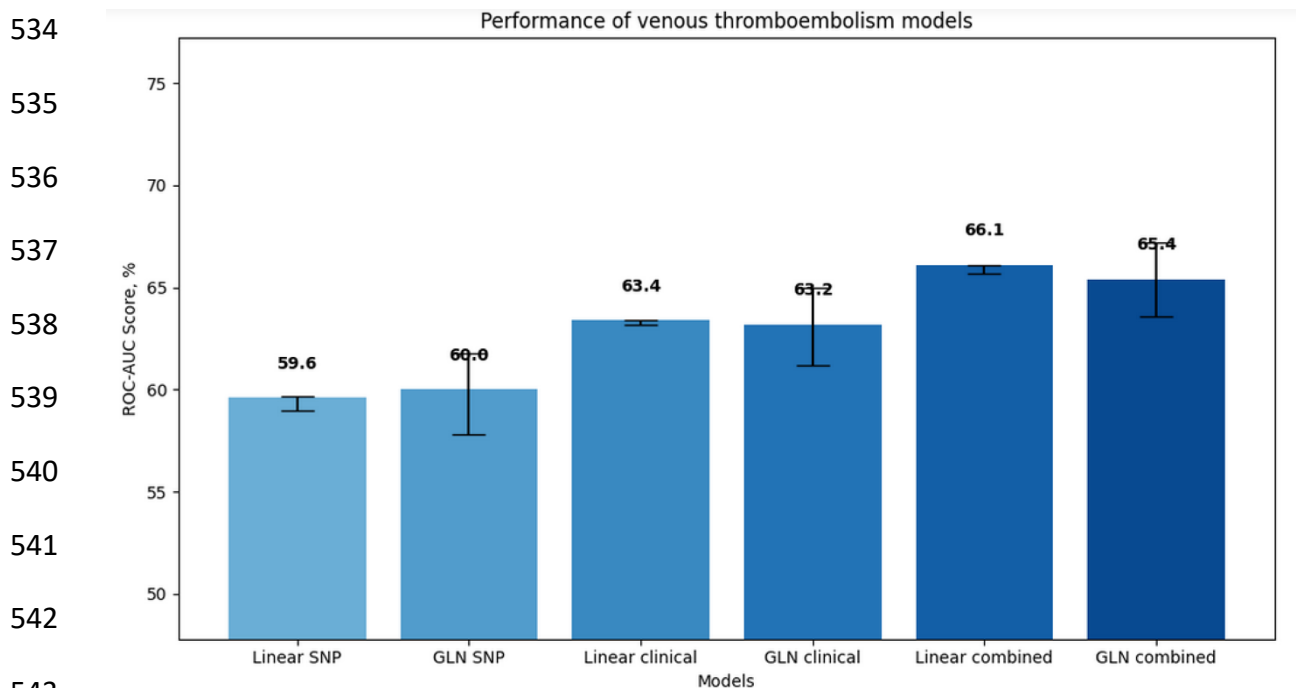

544

545

546 **Figure 3C:** Bar plot of ROC-AUCs of all pneumonia models

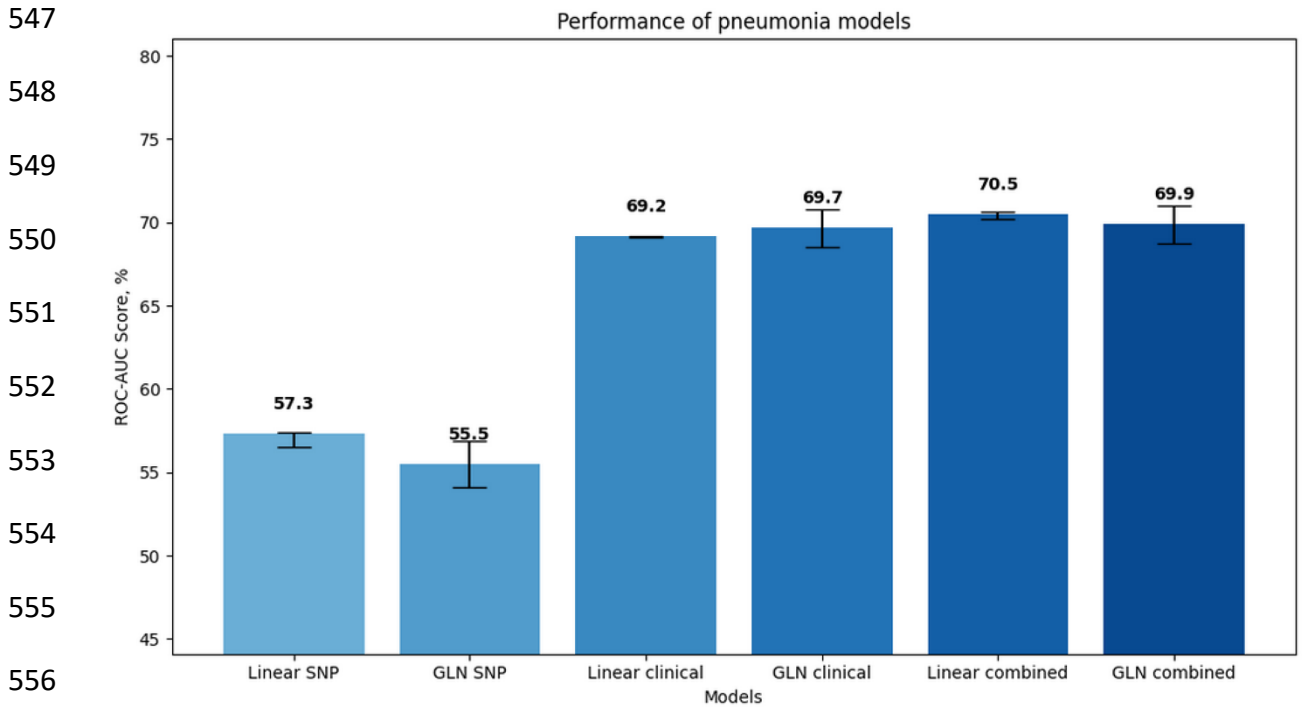

557

558

559

560

561

562

563

564

565

566

567

568

569

570

571 **Table 1:** Baseline characteristics for atrial fibrillation cohort

572

| Characteristic                      | AF<br>N = 19,900   | No AF<br>N = 426,280 |
|-------------------------------------|--------------------|----------------------|
| Age, mean, SD                       | 62.2 $\square$ 5.9 | 56.4 $\square$ 8.0   |
| Female, N, %                        | 6,623 (33.2)       | 233,351 (54.7)       |
| BMI, mean, SD                       | 27.4 $\square$ 5.4 | 29.1 $\square$ 1     |
| Previous or current smoker,<br>N, % | 9,633 (48.4)       | 159,702 (37.5)       |
| Previous or current cancer,<br>N, % | 2,307 (11.6)       | 35,338 (8.3)         |
| Heart failure, N, %                 | 2,922 (14.7)       | 3,252 (0.7)          |
| Hypertension, N, %                  | 12,385 (62.2)      | 86,999 (20.4)        |

573

574 **Table 2:** Baseline characteristics for venous thromboembolism cohort

575

| Characteristic                      | VTE<br>N = 9,193   | No VTE<br>N = 436,987 |
|-------------------------------------|--------------------|-----------------------|
| Age, mean, SD                       | 59.7 $\square$ 7.1 | 56.6 $\square$ 8.0    |
| Female, N, %                        | 4,156 (45.2)       | 235,818 (54.0)        |
| BMI, mean, SD                       | 29.4 $\square$ 5.5 | 27.4 $\square$ 4.8    |
| Previous or current smoker,<br>N, % | 3,842 (41.8)       | 165,493 (37.9)        |



|                                     |              |               |
|-------------------------------------|--------------|---------------|
| Previous or current cancer,<br>N, % | 1,403 (15.3) | 36,242 (8.3)  |
| Heart failure, N, %                 | 482 (5.2)    | 5,692 (1.3)   |
| Hypertension, N, %                  | 3,906 (42.5) | 95,478 (21.8) |

576

577

578 **Table 3:** Baseline characteristics for pneumonia

579

| Characteristic                      | Pneumonia<br>N = 14,101 | No pneumonia<br>N = 432,079 |
|-------------------------------------|-------------------------|-----------------------------|
| Age, mean, SD                       | 60.3 □ 7.2              | 56.5 □ 8.0                  |
| Female, N, %                        | 6,101 (43.3)            | 233,873 (54.1)              |
| BMI, mean, SD                       | 28.4 □ 5.6              | 27.5 □ 4.8                  |
| Previous or current smoker,<br>N, % | 6,464 (45.8)            | 162,871 (37.7)              |
| Previous or current cancer,<br>N, % | 2,144 (15.2)            | 35,501(8.2)                 |
| Heart failure, N, %                 | 1,506 (10.7)            | 4,668 (1.11)                |
| Hypertension, N, %                  | 7,120 (50.5)            | 92,264 (21.4)               |

580

581

582

583

584

585 **Table 4A:** Table of the SNPs with the highest feature importance for the single nucleotide  
 586 polymorphism (SNP), and combined atrial fibrillation GLN-models  
 587

| Top SNP in SNP model | Gene                | Top SNP in combined model | Gene         |
|----------------------|---------------------|---------------------------|--------------|
| rs3807989            | <i>CAVI</i>         | rs3807989                 | <i>CAVI</i>  |
| rs56250774           | <i>PRRX1</i>        | rs13124249                | Intergenic   |
| rs11047543           | <i>LOC105369698</i> | rs13125644                | Intergenic   |
| rs1570220            | <i>SH3PXD2A</i>     | rs4835669                 | <i>NME5</i>  |
| rs3825214            | <i>TBX5</i>         | rs6658392                 | <i>KCNN3</i> |

588  
 589 **Table 4B:** Table of the SNPs with the highest feature importance for the genetic, and mixed  
 590 atrial fibrillation linear models  
 591

| Genetic, SNP | Gene               | Mixed, SNP | Gene               |
|--------------|--------------------|------------|--------------------|
| rs17042171   | Intergenic         | rs17042171 | Intergenic         |
| rs10033464   | Intergenic         | rs10033464 | Intergenic         |
| rs3807988    | <i>CAVI</i>        | rs3731748  | <i>TTN/TTN-ASI</i> |
| rs3731748    | <i>TTN/TTN-ASI</i> | rs3807988  | <i>CAVI</i>        |
| rs2723065    | <i>LINC02576</i>   | rs3829747  | <i>TTN/TTN-ASI</i> |

592  
 593  
 594  
 595  
 596

597 **Table 4C:** Table of the SNPs with the highest feature importance for the single nucleotide  
598 polymorphism (SNP), and combined venous thromboembolism GLN-models  
599

| Top SNP in SNP model | Gene       | Top SNP in combined model | Gene           |
|----------------------|------------|---------------------------|----------------|
| rs505922             | <i>ABO</i> | Rs6993770                 | <i>ZFPM2</i>   |
| rs657152             | <i>ABO</i> | Rs687621                  | <i>ABO</i>     |
| rs8176740            | <i>ABO</i> | Rs75112989                | <i>ATP1B1</i>  |
| rs7868232            | Intergenic | Rs3746438                 | <i>MYH7B</i>   |
| rs581107             | <i>ABO</i> | Rs56103207                | <i>TSPAN15</i> |

600

601 **Table 4D:** Table of the SNPs with the highest feature importance for the genetic, and mixed  
602 Venous thromboembolism linear models

603

| Genetic, SNP | Gene          | Mixed, SNP | Gene          |
|--------------|---------------|------------|---------------|
| rs4524       | <i>F5</i>     | rs4524     | <i>F5</i>     |
| rs6030       | <i>F5</i>     | rs6120849  | <i>EDEM2</i>  |
| rs6120849    | <i>EDEM2</i>  | rs6030     | <i>F5</i>     |
| rs75112989   | <i>ATP1B1</i> | rs75112989 | <i>ATP1B1</i> |
| rs6050       | <i>FGA</i>    | rs507666   | <i>ABO</i>    |

604

605

606

607

608

609 **Table 4E:** Table of the SNPs with the highest feature importance for the single nucleotide  
 610 polymorphism (SNP), and combined pneumonia GLN-models  
 611

| Top SNP in SNP model | Gene                | Top SNP in combined model | Gene                    |
|----------------------|---------------------|---------------------------|-------------------------|
| rs11080143           | Intergenic          | rs17143419                | <i>GALNT17</i>          |
| rs72976957           | <i>PIAS4</i>        | rs2476601                 | <i>PTPN22/AP4B1-ASI</i> |
| rs2381116            | <i>FAM219A</i>      | rs72793809                | <i>LOC124903672</i>     |
| rs76002435           | <i>MED27</i>        | rs361594                  | <i>PEX26</i>            |
| rs75766461           | <i>LOC124902060</i> | rs219258                  | Intergenic              |

612

613

614 **Table 4F:** Table of the SNPs with the highest feature importance for the genetic, and mixed  
 615 pneumonia linear models

616

| Genetic, SNP | Gene              | Mixed, SNP | Gene              |
|--------------|-------------------|------------|-------------------|
| rs10519203   | <i>HYKK</i>       | rs10519203 | <i>HYKK</i>       |
| rs7498665    | <i>SH2B1</i>      | rs61921073 | Intergenic        |
| rs8062405    | <i>ATXN2l</i>     | rs8062405  | <i>ATXN2l</i>     |
| rs77139199   | <i>GASK1B-ASI</i> | rs77139199 | <i>GASK1B-ASI</i> |
| rs61921073   | Intergenic        | rs62531875 | Intergenic        |

617

618

619

620 **Figure 4:** Selection and quality control steps of individuals and SNPs in the UKB

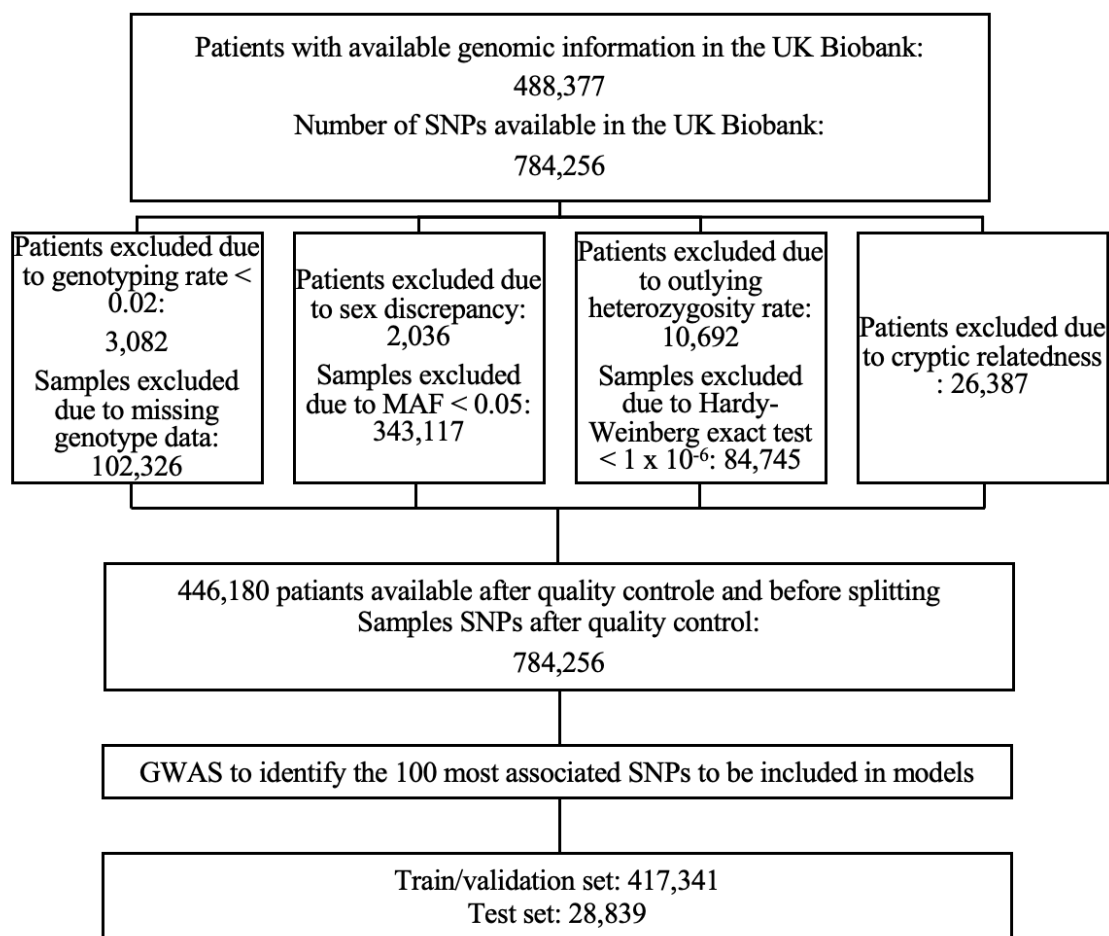

621

622

623

624

625

626

627

628

629

630

631 **Supplementary table 1:** List of ICD-9 and ICD-10 codes used for the phenotypes in  
632 question.

|                                         |                                                                                                                                                   |
|-----------------------------------------|---------------------------------------------------------------------------------------------------------------------------------------------------|
| ICD-9 codes for atrial fibrillation     | 4273                                                                                                                                              |
| ICD-10 codes for atrial fibrillation    | I48, I480, I481, I483, I484, I489                                                                                                                 |
| ICD-9 codes for venous thromboembolism  | 4151, 4511, 4512, 4519, 4531, 4532, 4534, 4538, 4539, 4534, 4531, 4532, 4539                                                                      |
| ICD-10 codes for venous thromboembolism | I260, I269, I801, I802, I803, I808, I809, I820, I821, I822, I823, I828, I829, O082, O223, O871, O882, I81                                         |
| ICD-9 codes for pneumonia               | 4810, 4820, 4821, 4823, 4824, 4828, 4829, 4830, 4831, 4838, 4840, 4841, 4843, 4835, 4836, 4847, 4848, 4850, 4860                                  |
| ICD-10 codes for pneumonia              | J13, J14, J150, J151, J152, J153, J154, J155, J156, J157, J158, J159, J16, J160, J168, J170, J172, J173, J178, J180, J181, J182, J188, J189, J851 |

633

634

635

636

637 **Supplementary table 2:** List of OPCS-4 codes used to define surgery.

|                                                                                                                                                                                                                                                                                                                                                                                                                                                                                                                                                                                                                                                                                                                                                                                                                                                                                                          |
|----------------------------------------------------------------------------------------------------------------------------------------------------------------------------------------------------------------------------------------------------------------------------------------------------------------------------------------------------------------------------------------------------------------------------------------------------------------------------------------------------------------------------------------------------------------------------------------------------------------------------------------------------------------------------------------------------------------------------------------------------------------------------------------------------------------------------------------------------------------------------------------------------------|
| ['W401', 'W371', 'W381', 'W822', 'Q074', 'M021', 'K453', 'J183', 'M611', 'G693', 'W201', 'W205', 'M025', 'T202', 'T413', 'W852', 'W192', 'W411', 'H335', 'J692', 'W164', 'W191', 'T252', 'K262', 'W421', 'G753', 'W283', 'Q221', 'A054', 'S065', 'W373', 'W391', 'B282', 'W593', 'M022', 'W153', 'A401', 'H114', 'H333', 'H114', 'J021', 'V255', 'T309', 'H053', 'W199', 'W581', 'L841', 'L931', 'L948', 'W242', 'A411', 'S472', 'A651', 'W461', 'L851', 'S069', 'C751', 'W192', 'W941', 'W403', 'L622', 'W241', 'E543', 'T676', 'S571', 'B274', 'Q075', 'H071', 'H336', 'R182', 'G743', 'A025', 'W879', 'T962', 'G011', 'H012', 'W742', 'G331', 'W858', 'J011', 'T791', 'H041', 'H511', 'W833', 'M341', 'L185', 'W931', 'A021', 'H334', 'T439', 'B285', 'A022', 'W083', 'W246', 'H338', 'W791', 'B279', 'G031', 'W521', 'W621', 'W243', 'T838', 'L191', 'J699', 'T969', 'A013', 'W654', 'W085', 'A611', |
|----------------------------------------------------------------------------------------------------------------------------------------------------------------------------------------------------------------------------------------------------------------------------------------------------------------------------------------------------------------------------------------------------------------------------------------------------------------------------------------------------------------------------------------------------------------------------------------------------------------------------------------------------------------------------------------------------------------------------------------------------------------------------------------------------------------------------------------------------------------------------------------------------------|

'K403', 'O291', 'P232', 'H331', 'A671', 'Q013', 'K263', 'W042', 'H073', 'T391', 'L843', 'H011',  
'W198', 'H095', 'L845', 'L192', 'E528', 'L516', 'G218', 'A023', 'T678', 'M012', 'M612',  
'K402', 'L871', 'W571', 'V339', 'H074', 'A384', 'A388', 'W208', 'M538', 'W871', 'M278',  
'W424', 'M421', 'V337', 'H072', 'G698', 'Q231', 'W152', 'V468', 'H042', 'T273', 'G243',  
'B293', 'A295', 'G784', 'J576', 'B311', 'W222', 'T423', 'G699', 'L842', 'W802', 'R172', 'V254',  
'W082', 'T272', 'W451', 'T521', 'L593', 'V253', 'V256', 'V209', 'P242', 'H103', 'W431',  
'W382', 'S551', 'T723', 'V411', 'W471', 'W423', 'A389', 'B083', 'T748', 'M013', 'J023',  
'T242', 'T679', 'V291', 'W301', 'H062', 'H051', 'J561', 'V221', 'S068', 'A383', 'Q089', 'W803',  
'G648', 'G352', 'E032', 'E248', 'V031', 'G521', 'T331', 'J091', 'W122', 'G532', 'H092', 'W821',  
'W402', 'F349', 'M039', 'F442', 'W961', 'H013', 'L591', 'J185', 'T162', 'G748', 'T531', 'B181',  
'V462', 'W399', 'M231', 'B312', 'W384', 'V433', 'G694', 'L181', 'Q092', 'W951', 'A108',  
'H105', 'W194', 'L258', 'V143', 'H079', 'E541', 'T316', 'H091', 'L601', 'J569', 'W712', 'G289',  
'L541', 'W282', 'G303', 'E542', 'W211', 'Q079', 'M051', 'J552', 'K255', 'H332', 'W202',  
'H151', 'S022', 'W752', 'A511', 'G028', 'L131', 'L233', 'S172', 'W158', 'R181', 'W743',  
'A473', 'M014', 'V336', 'W288', 'H029', 'W212', 'T278', 'W891', 'V403', 'F222', 'H412',  
'K334', 'A445', 'T551', 'G234', 'W859', 'V037', 'J582', 'J042', 'J571', 'K301', 'J024', 'J571',  
'K301', 'J024', 'W195', 'L581', 'H131', 'G633', 'M373', 'N288', 'W834', 'V294', 'V039',  
'V152', 'H052', 'M191', 'W393', 'L198', 'S251', 'K412', 'A412', 'T792', 'S552', 'H142', 'H064',  
'V241', 'J012', 'G283', 'L343', 'F231', 'F451', 'W193', 'L844', 'H085', 'W308', 'W332', 'T972',  
'L582', 'O182', 'T229', 'G492', 'T458', 'E294', 'K335', 'T262', 'Q518', 'J578', 'V392', 'E148',  
'H113', 'L583', 'G242', 'L682', 'L621', 'T412', 'T342', 'L798', 'V104', 'J025', 'A652', 'T622',  
'W214', 'W629', 'H104', 'G281', 'K454', 'T671', 'W395', 'T243', 'H101', 'E036', 'A028',  
'H112', 'L201', 'T525', 'L624', 'W422', 'H118', 'V383', 'B223', 'L628', 'B012', 'W232', 'T251',  
'J028', 'K451', 'G312', 'L124', 'H061', 'L818', 'T203', 'O181', 'K023', 'L602', 'G278', 'W144',  
'V313', 'P251', 'N113', 'E192', 'V242', 'W033', 'C134', 'L193', 'G734', 'M348', 'F443', 'E042',

'B284', 'G601', 'W523', 'G789', 'G013',  
'W832', 'J182', 'J219', 'L592', 'W196', 'T212', 'W068', 'M619', 'W433', 'T675', 'G362',  
'W238', 'V402', 'G584', 'W131', 'T798', 'V259', 'T724', 'K253', 'H152', 'K021', 'W038',  
'W231', 'V223', 'M359', 'T259', 'E532', 'T318', 'H019', 'T222', 'G232', 'W091', 'A386',  
'H358', 'L194', 'J189', 'K272', 'W758', 'G251', 'T209', 'W372', 'L598', 'L587']

638

639 **Supplementary table 3: Demographics and comorbidities with ICD-codes**

|               |                                                                                                                                                                                                                                                                                                                                                                                                                                                                                                                                                                                                        |
|---------------|--------------------------------------------------------------------------------------------------------------------------------------------------------------------------------------------------------------------------------------------------------------------------------------------------------------------------------------------------------------------------------------------------------------------------------------------------------------------------------------------------------------------------------------------------------------------------------------------------------|
| Demographics  | <p><b>Age</b> (UKB code field: 21022-0.0)</p> <p><b>Sex</b> (UKB code field: 31-0.0)</p>                                                                                                                                                                                                                                                                                                                                                                                                                                                                                                               |
| Comorbidities | <p><b>Previous or current smoker</b> (UKB code field: 1249-0.0, 1249-1.0, 1249-2.0, 1249-3.0)</p> <p><b>Hypertension</b> (ICD-10: I10, I100, I101, I102, I103, I104, I105, I106, I107, I108, I109, I13, I130, I131, I132, I133, I134, I135, I136, I137, I138, I139, I15, I150, I151, I152, I153, I154, I155, I156, I157, I158, I159)</p> <p><b>Cancer</b> (UKB code field: 2453-0.0, 2453-1.0, 2453-2.0, 2453-3.0 ), heart failure (ICD-10: I50, I501, I502, I5020, I5021, I5022, I5023, I503, I5030, I5031, I5032, I5033, I504, I5041, I5042, I5043, I508, I5081, I50810, I50810, I50811, I50812,</p> |



|  |                                                                                                                              |
|--|------------------------------------------------------------------------------------------------------------------------------|
|  | I50813, I50814, I5082, I5083, I5084, I5089, I509)<br><b>BMI</b> (UKB code field: 21001-0.0, 21001-1.0, 21001-2.0, 21001-3.0. |
|--|------------------------------------------------------------------------------------------------------------------------------|

640

641

642

643

644

645

646

647

648

649

650

651

652

653

654

655

656

657

658

659

660

661

## REFERENCES

- 662 1. Ozgediz D, Jamison D, Cherian M, McQueen K. The burden of surgical conditions  
663 and access to surgical care in low- and middle-income countries. *Bull World Health Organ.*  
664 2008;86(8):646-7.
- 665 2. Weiser TG, Haynes AB, Molina G, Lipsitz SR, Esquivel MM, Uribe-Leitz T, et al.  
666 Estimate of the global volume of surgery in 2012: an assessment supporting improved health  
667 outcomes. *Lancet.* 2015;385 Suppl 2:S11.
- 668 3. Dencker EE, Bonde A, Troelsen A, Varadarajan KM, Sillesen M. Postoperative  
669 complications: an observational study of trends in the United States from 2012 to 2018. *BMC*  
670 *Surg.* 2021;21(1):393.
- 671 4. Bertsimas D, Dunn J, Velmahos GC, Kaafarani HMA. Surgical Risk Is Not Linear:  
672 Derivation and Validation of a Novel, User-friendly, and Machine-learning-based Predictive  
673 OpTimal Trees in Emergency Surgery Risk (POTTER) Calculator. *Ann Surg.*  
674 2018;268(4):574-83.
- 675 5. Bilimoria KY, Liu Y, Paruch JL, Zhou L, Kmiecik TE, Ko CY, et al. Development  
676 and evaluation of the universal ACS NSQIP surgical risk calculator: a decision aid and  
677 informed consent tool for patients and surgeons. *J Am Coll Surg.* 2013;217(5):833-42 e1-3.
- 678 6. M AC, Bonde A, Sillesen M. An assessment of the effect of the genotype on  
679 postoperative venous thromboembolism risk in 140,831 surgical patients. *Ann Med Surg*  
680 *(Lond).* 2021;71:102938.
- 681 7. Christensen MA, Bonde A, Sillesen M. Genetic risk factors for postoperative atrial  
682 fibrillation—a nationwide genome-wide association study (GWAS). *Frontiers in*  
683 *Cardiovascular Medicine.* 2023;10.
- 684 8. Gaudino M, Di Castelnuovo A, Zamparelli R, Andreotti F, Burzotta F, Iacoviello L, et  
685 al. Genetic control of postoperative systemic inflammatory reaction and pulmonary and renal  
686 complications after coronary artery surgery. *J Thorac Cardiovasc Surg.* 2003;126(4):1107-12.
- 687 9. Kolek MJ, Muehlschlegel JD, Bush WS, Parvez B, Murray KT, Stein CM, et al.  
688 Genetic and clinical risk prediction model for postoperative atrial fibrillation. *Circ Arrhythm*  
689 *Electrophysiol.* 2015;8(1):25-31.
- 690 10. Bonde A, Varadarajan KM, Bonde N, Troelsen A, Muratoglu OK, Malchau H, et al.  
691 Assessing the utility of deep neural networks in predicting postoperative surgical  
692 complications: a retrospective study. *Lancet Digit Health.* 2021;3(8):e471-e85.
- 693 11. Dela Cruz CS, Wunderink RG, Christiani DC, Cormier SA, Crothers K, Doerschuk  
694 CM, et al. Future Research Directions in Pneumonia. NHLBI Working Group Report. *Am J*  
695 *Respir Crit Care Med.* 2018;198(2):256-63.
- 696 12. Bycroft C, Freeman C, Petkova D, Band G, Elliott LT, Sharp K, et al. The UK  
697 Biobank resource with deep phenotyping and genomic data. *Nature.* 2018;562(7726):203-9.
- 698 13. R Core Team (2020). R: A language and environment for statistical  
699 computing. R Foundation for Statistical Computing, Vienna, Austria.  
700 URL <https://www.R-project.org/>.
- 701 14. Pedregosa F, Varoquaux G, Gramfort A, Michel V, Thirion B, Grisel O, et al. Scikit-  
702 learn: Machine Learning in Python. *J Mach Learn Res.* 2011;12(null):2825–30.
- 703 15. Sigurdsson AI, Louloudis I, Banasik K, Westergaard D, Winther O, Lund O, et al.  
704 Deep integrative models for large-scale human genomics. *Nucleic Acids Research.* 2023.
- 705 16. Kingma D, Ba J. Adam: A Method for Stochastic Optimization. *International*  
706 *Conference on Learning Representations.* 2014.
- 707 17. Lundberg SM LS. A unified approach to interpreting model predictions. *Advances in*  
708 *Neural Information Processing Systems 30 (NIPS).* 2017.

- 709 18. Lawson EH, Louie R, Zingmond DS, Brook RH, Hall BL, Han L, et al. A comparison  
710 of clinical registry versus administrative claims data for reporting of 30-day surgical  
711 complications. *Ann Surg.* 2012;256(6):973-81.
- 712 19. Zhang T, Shang F, Ma Y, Xu Y, Sun W, Song H. Caveolin-1 Promotes the Imbalance  
713 of Th17/Treg in Chronic Obstructive Pulmonary Disease by Regulating Hsp70 Expression.  
714 *Int J Chron Obstruct Pulmon Dis.* 2023;18:565-74.
- 715 20. Williams TM, Lisanti MP. The Caveolin genes: from cell biology to medicine. *Ann*  
716 *Med.* 2004;36(8):584-95.
- 717 21. Jia W, Qi X, Li Q. Association Between Rs3807989 Polymorphism in Caveolin-1  
718 (CAV1) Gene and Atrial Fibrillation: A Meta-Analysis. *Med Sci Monit.* 2016;22:3961-6.
- 719 22. Liu Y, Ni B, Lin Y, Chen XG, Chen M, Hu Z, et al. The rs3807989 G/A  
720 polymorphism in CAV1 is associated with the risk of atrial fibrillation in Chinese Han  
721 populations. *Pacing Clin Electrophysiol.* 2015;38(2):164-70.
- 722 23. Zhao L, Chen XG, Liu Y, Fang Z, Zhang F. Association of rs17042171 with  
723 chromosome 4q25 with atrial fibrillation in Chinese Han populations. *Anatol J Cardiol.*  
724 2016;16(3):165-9.
- 725 24. Gudbjartsson DF, Arnar DO, Helgadóttir A, Gretarsdóttir S, Holm H, Sigurdsson A,  
726 et al. Variants conferring risk of atrial fibrillation on chromosome 4q25. *Nature.*  
727 2007;448(7151):353-7.
- 728 25. L. Phan YJ, H. Zhang, W. Qiang, E. Shekhtman, D. Shao, D. Revoe, R. Villamarin, E.  
729 Ivanchenko, M. Kimura, Z. Y. Wang, L. Hao, N. Sharopova, M. Bihan, A. Sturcke, M. Lee,  
730 N. Popova, W. Wu, C. Bastiani, M. Ward, J. B. Holmes, V. Lyoshin, K. Kaur, E. Moyer, M.  
731 Feolo, and B. L. Kattman. ALFA: Allele Frequency Aggregator." National Center for  
732 Biotechnology Information, U.S. National Library of Medicine. 2020.
- 733 26. Gao Y, Bertuccio CA, Balut CM, Watkins SC, Devor DC. Dynamin- and Rab5-  
734 dependent endocytosis of a Ca<sup>2+</sup>-activated K<sup>+</sup> channel, KCa2.3. *PLoS One.*  
735 2012;7(8):e44150.
- 736 27. Yi SL, Liu XJ, Zhong JQ, Zhang Y. Role of caveolin-1 in atrial fibrillation as an anti-  
737 fibrotic signaling molecule in human atrial fibroblasts. *PLoS One.* 2014;9(1):e85144.
- 738 28. Ellinor PT, Lunetta KL, Glazer NL, Pfeufer A, Alonso A, Chung MK, et al. Common  
739 variants in KCNN3 are associated with lone atrial fibrillation. *Nat Genet.* 2010;42(3):240-4.
- 740 29. Dentali F, Sironi AP, Ageno W, Turato S, Bonfanti C, Frattini F, et al. Non-O blood  
741 type is the commonest genetic risk factor for VTE: results from a meta-analysis of the  
742 literature. *Semin Thromb Hemost.* 2012;38(5):535-48.
- 743 30. Stebbing J, Zhang H, Xu Y, Lit LC, Green AR, Grothey A, et al. KSR1 regulates  
744 BRCA1 degradation and inhibits breast cancer growth. *Oncogene.* 2015;34(16):2103-14.
- 745 31. Lee J, Seol MY, Jeong S, Kwon HJ, Lee CR, Ku CR, et al. KSR1 is coordinately  
746 regulated with Notch signaling and oxidative phosphorylation in thyroid cancer. *J Mol*  
747 *Endocrinol.* 2015;54(2):115-24.
- 748 32. Hung RJ, McKay JD, Gaborieau V, Boffetta P, Hashibe M, Zaridze D, et al. A  
749 susceptibility locus for lung cancer maps to nicotinic acetylcholine receptor subunit genes on  
750 15q25. *Nature.* 2008;452(7187):633-7.
- 751 33. Schwartz AG, Cote ML, Wenzlaff AS, Land S, Amos CI. Racial differences in the  
752 association between SNPs on 15q25.1, smoking behavior, and risk of non-small cell lung  
753 cancer. *J Thorac Oncol.* 2009;4(10):1195-201.
- 754 34. Marwaha JS, Chen HW, Habashy K, Choi J, Spain DA, Brat GA. Appraising the  
755 Quality of Development and Reporting in Surgical Prediction Models. *JAMA Surg.*  
756 2023;158(2):214-6.
- 757
